# Supplementary figures and images for: BGX: a Bioconductor package for the Bayesian integrated analysis of Affymetrix GeneChips
Source: Springer Nature journal article supplement (doi:10.1186/1471-2105-8-439), 2007-11-12

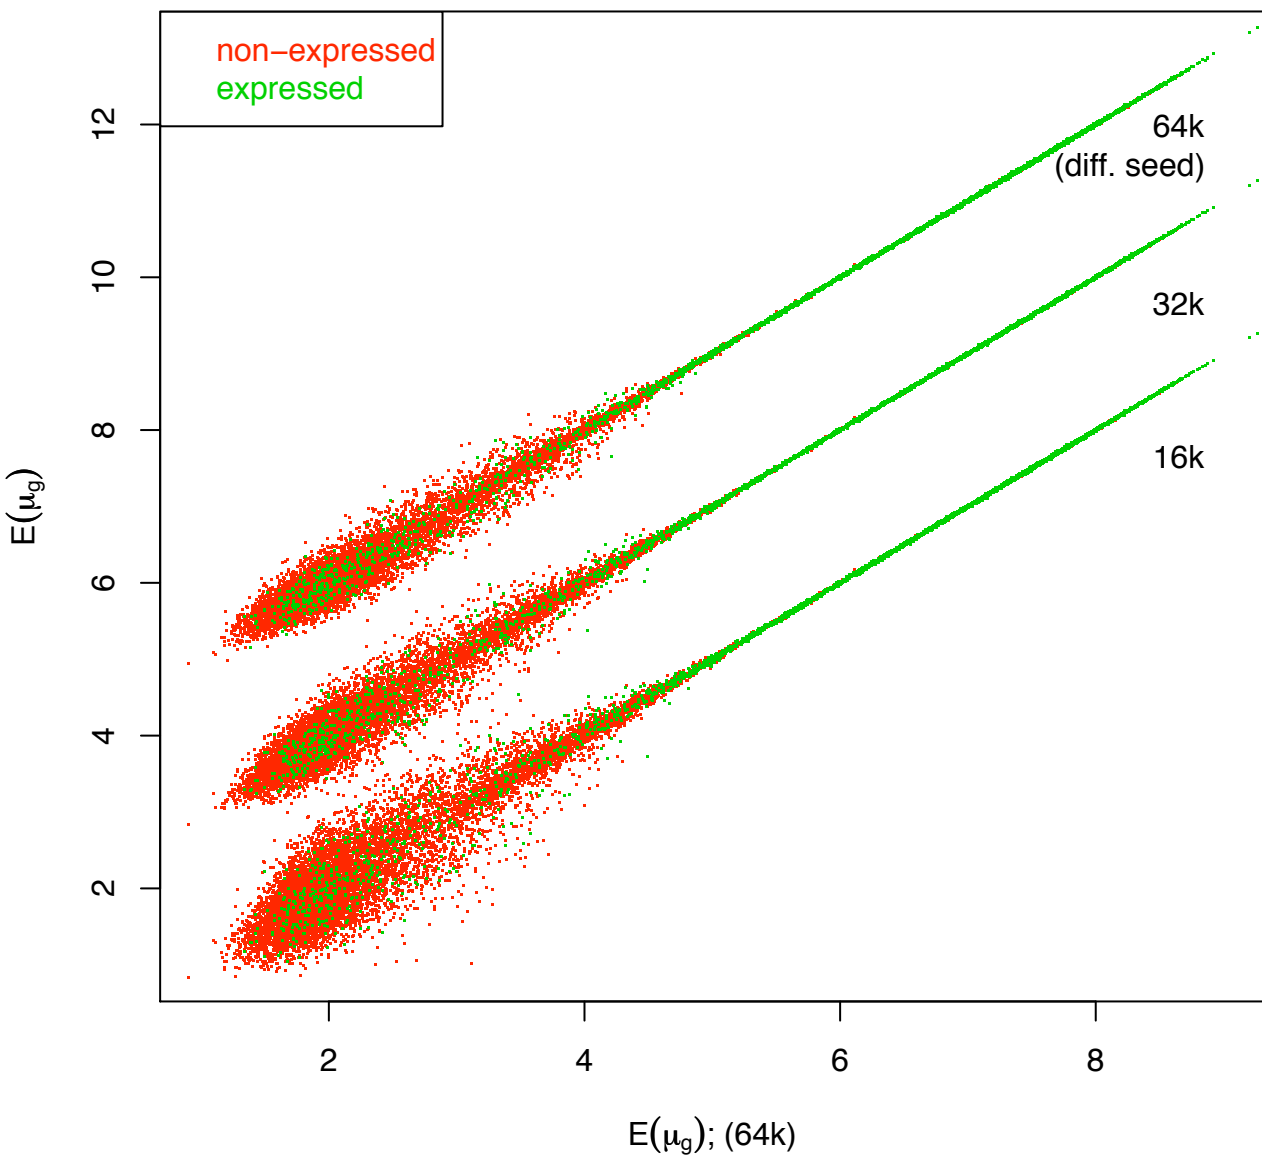

Supplement: Additional file 1 [file 1471-2105-8-439-s1.pdf]
